# Supplementary material for: Improved stability and enhanced efficiency of dye sensitized solar cells by using europium doped yttrium vanadate down-shifting nanophosphor
Source: Royal Society of Chemistry journal article supplement (doi:10.1039/c5ra10067d), 2015-01-01
Supplement: c5ra10067d1.pdf [file c5ra10067d1.pdf]

## Supporting Information

### **Improved stability and enhanced efficiency of dye sensitized solar cells by use of europium doped yttrium vanadate down-shifting nanophosphor**

Nikhil Chander<sup>a,\*</sup>, Atif F. Khan<sup>b</sup> and Vamsi K. Komarala<sup>a</sup>

<sup>a</sup> Photovoltaic Laboratory, Centre for Energy Studies, Indian Institute of Technology Delhi, New Delhi 110016, INDIA

<sup>b</sup> Department of Electronics and Information Technology, Ministry of Communications and Information Technology, Government of India, New Delhi 110003, INDIA

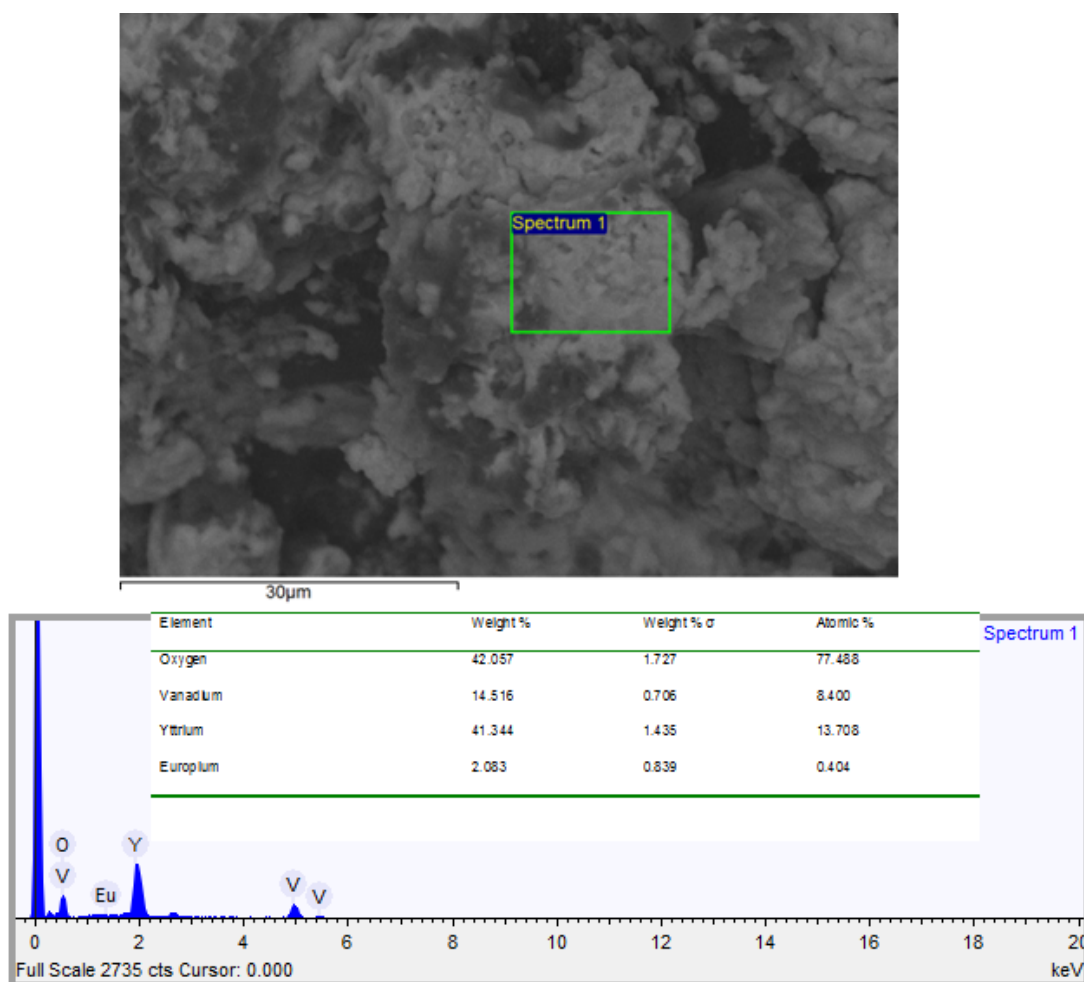

**Fig. S1.** Energy dispersive X-ray spectrum (EDS) of the synthesized  $\text{YVO}_4:\text{Eu}^{3+}$  nanophosphor recorded using Hitachi TM3000 table-top scanning electron microscope equipped with SwiftED 3000 EDX detector.

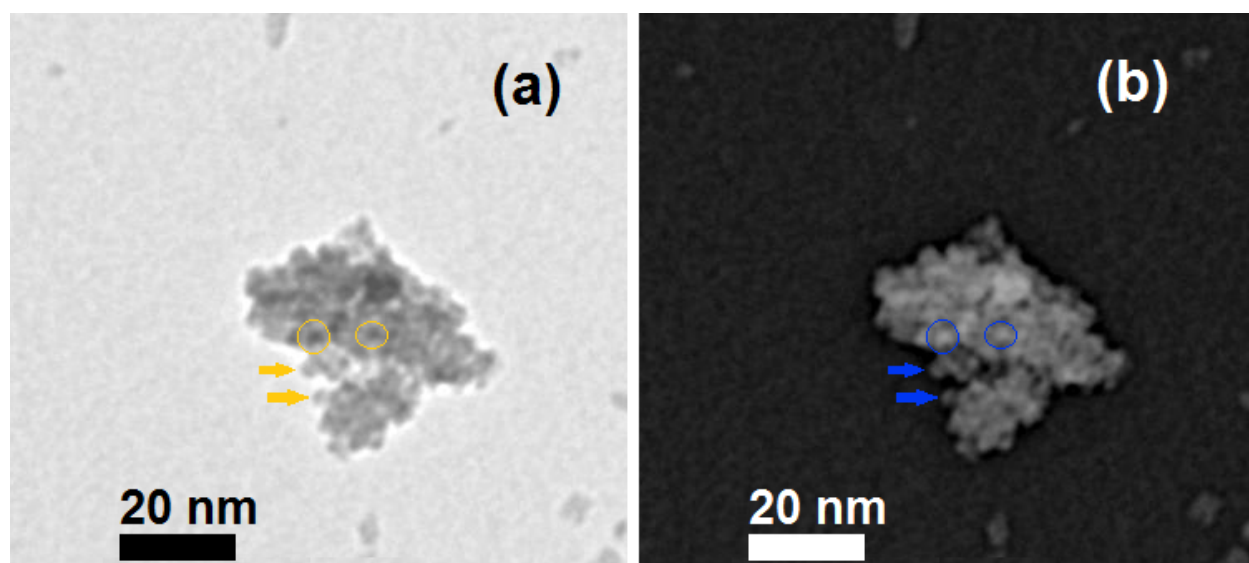

**Fig. S2.** (a) Transmission electron micrograph of  $\text{YVO}_4:\text{Eu}^{3+}$  nanoparticles and (b) its inverted color image. The size of nanoparticles, as seen from the images, is less than 5 nm.

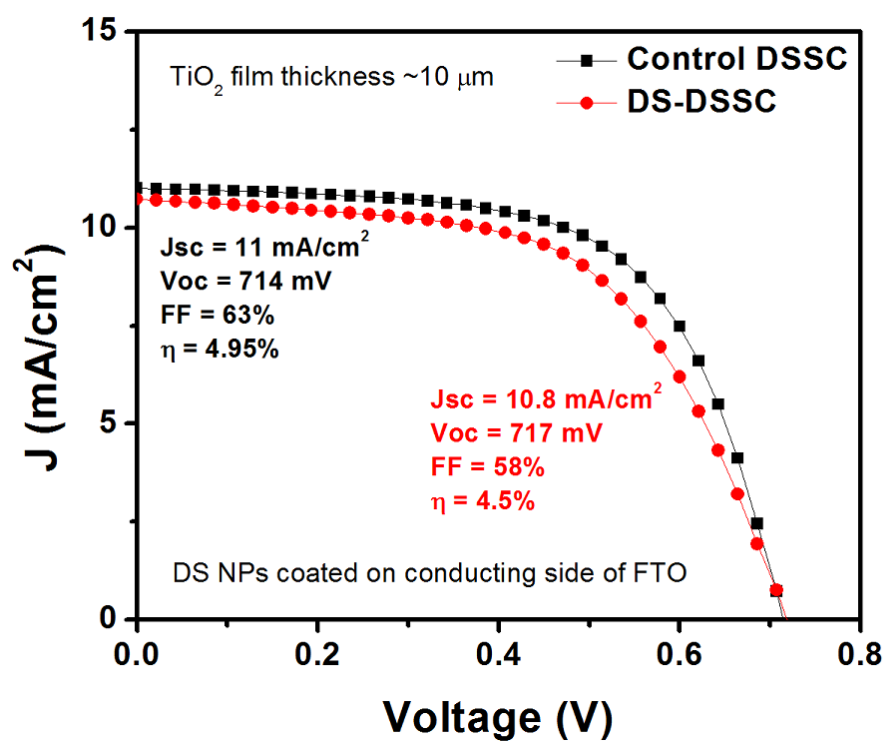

**Fig. S3.** Current density-voltage curve of control and DS-DSSCs. The phosphor nanoparticles are coated on the conducting side of FTO substrate.

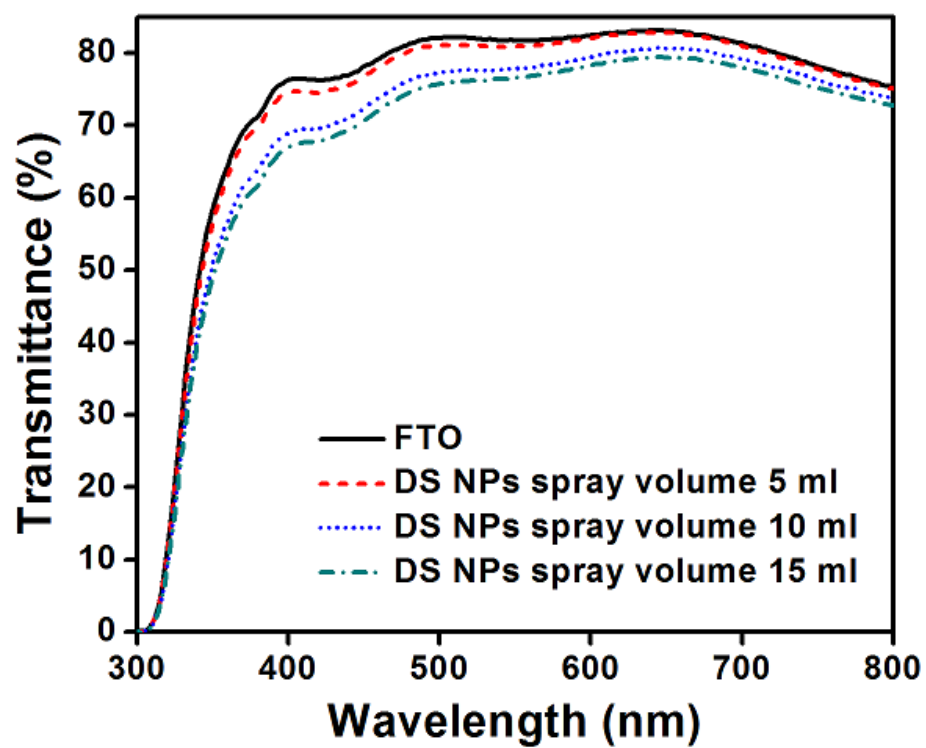

**Fig. S4.** Transmittance spectra of bare and phosphor coated FTO substrates.

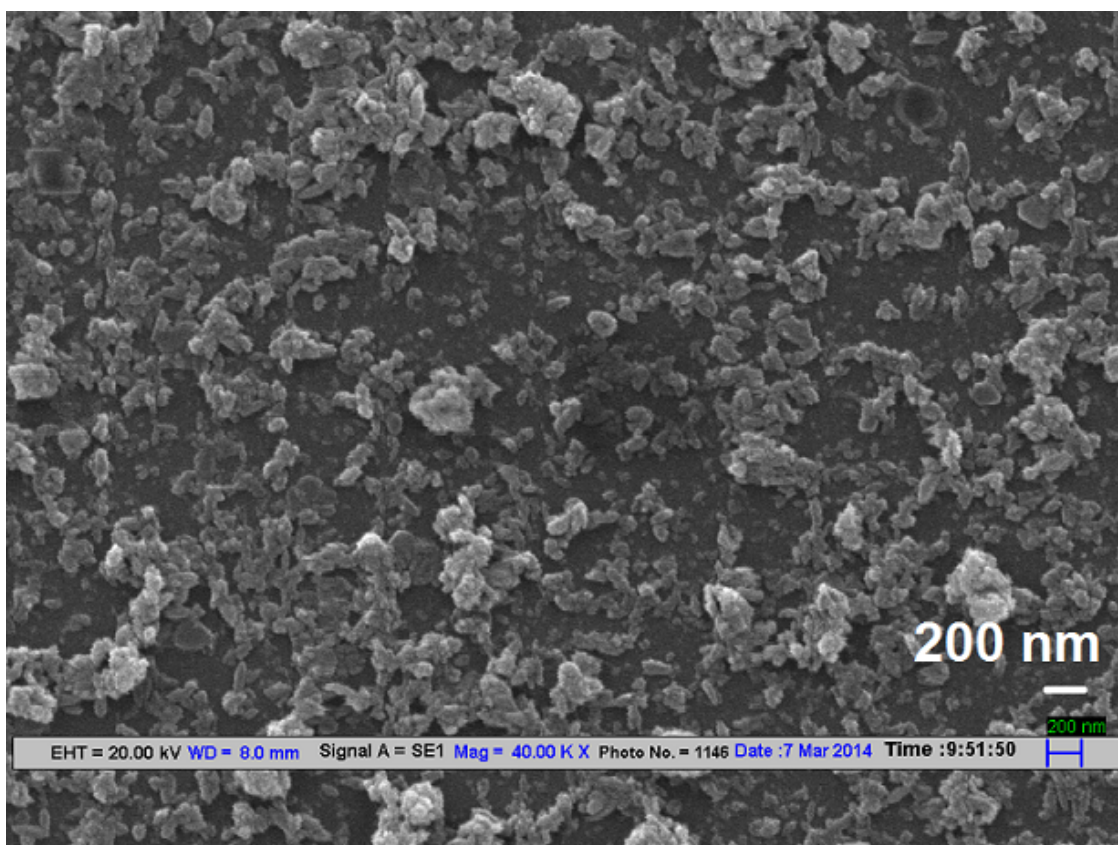

**Fig. S5.** Scanning electron micrograph of a spray deposited nanophosphor film on glass substrate.
